# Supplementary material for: Modular Assessment of Rainfall–Runoff Models Toolbox (MARRMoT) v2.1: an object-oriented implementation of 47 established hydrological models for improved speed and readability
Source: Copernicus journal article supplement (doi:10.5194/gmd-15-6359-2022), 2022-08-26
Supplement: Supplementary file 1 [file gmd-15-6359-2022-supplement.pdf]

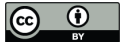

*Supplement of*

**Modular Assessment of Rainfall–Runoff Models Toolbox (MARRMoT) v2.1: an object-oriented implementation of 47 established hydrological models for improved speed and readability**

**Luca Trotter et al.**

*Correspondence to:* Luca Trotter ([l.trotter@unimelb.edu.au](mailto:l.trotter@unimelb.edu.au))

The copyright of individual parts of the supplement might differ from the article licence.

Additional figures

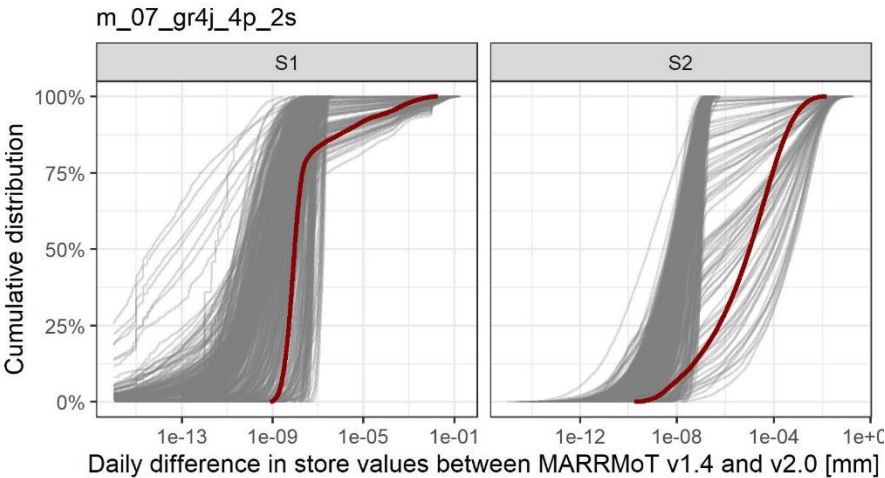

Figure S1: Differences in daily storage between MARRMoT v1.4 and v2.0 of m\_07\_gr4j\_4p\_2s. Each grey line is one of 559 catchments, red line indicates their average.

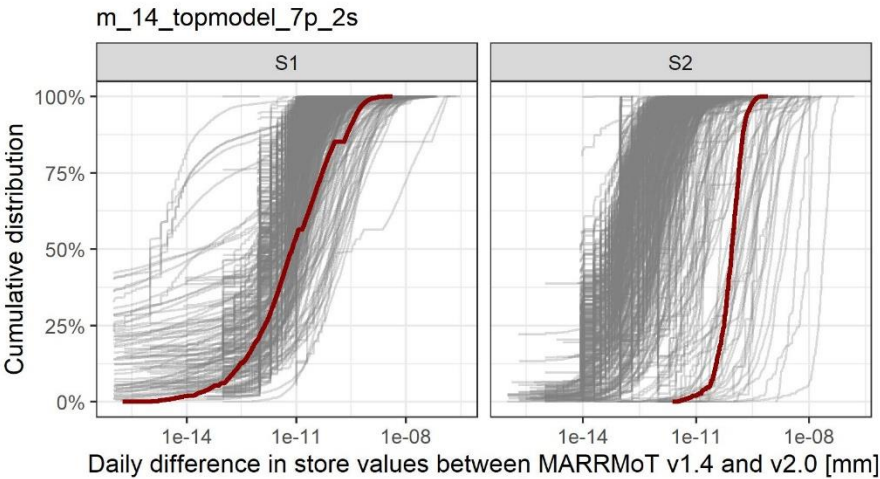

Figure S2: Differences in daily storage between MARRMoT v1.4 and v2.0 of m\_14\_topmodel\_7p\_2s. Each grey line is one of 559 catchments, red line indicates their average.

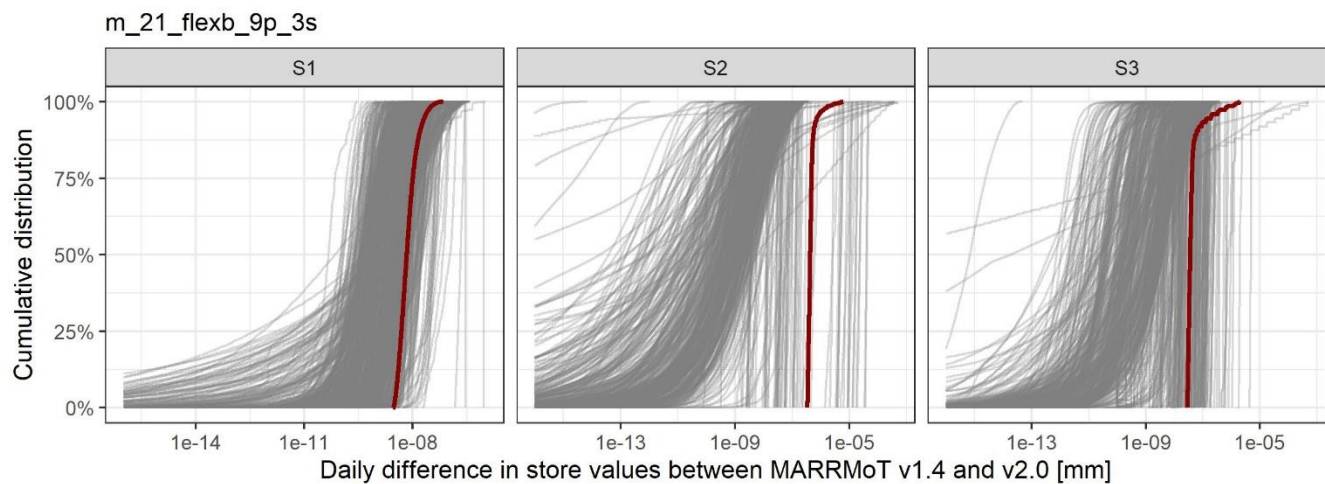

**Figure S3: Differences in daily storage between MARRMoT v1.4 and v2.0 of m\_21\_flexb\_9p\_3s. Each grey line is one of 559 catchments, red line indicates their average.**

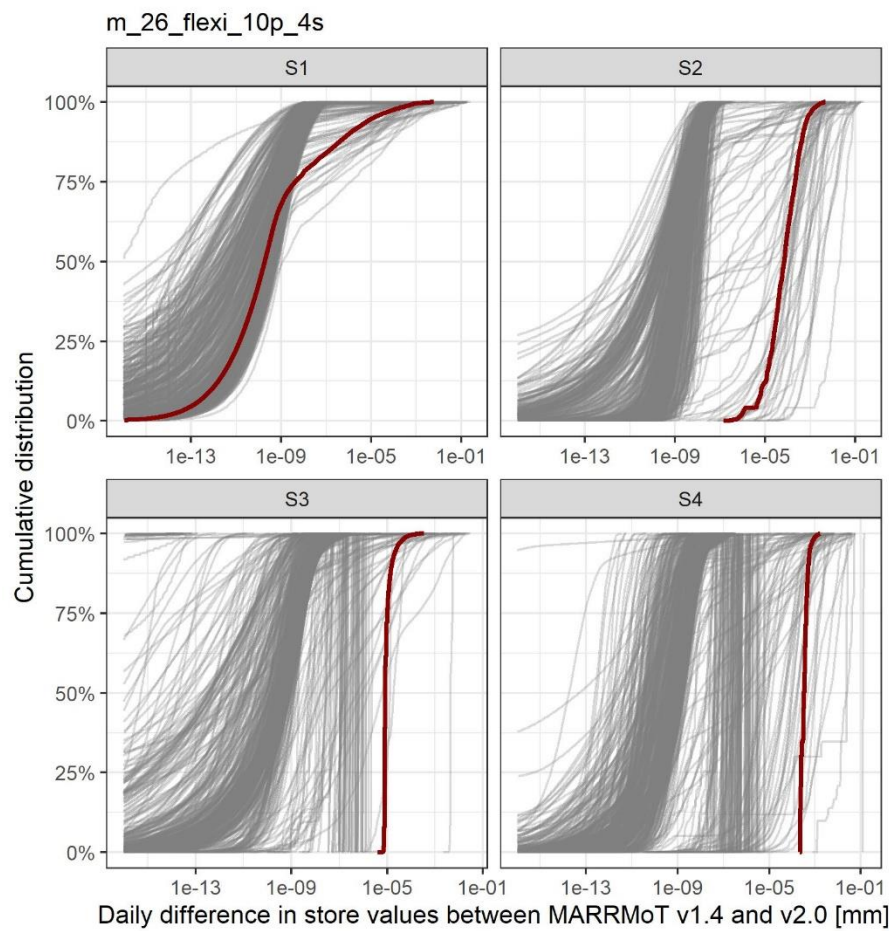

**Figure S4: Differences in daily storage between MARRMoT v1.4 and v2.0 of m\_26\_flexi\_10p\_4s. Each grey line is one of 559 catchments, red line indicates their average.**

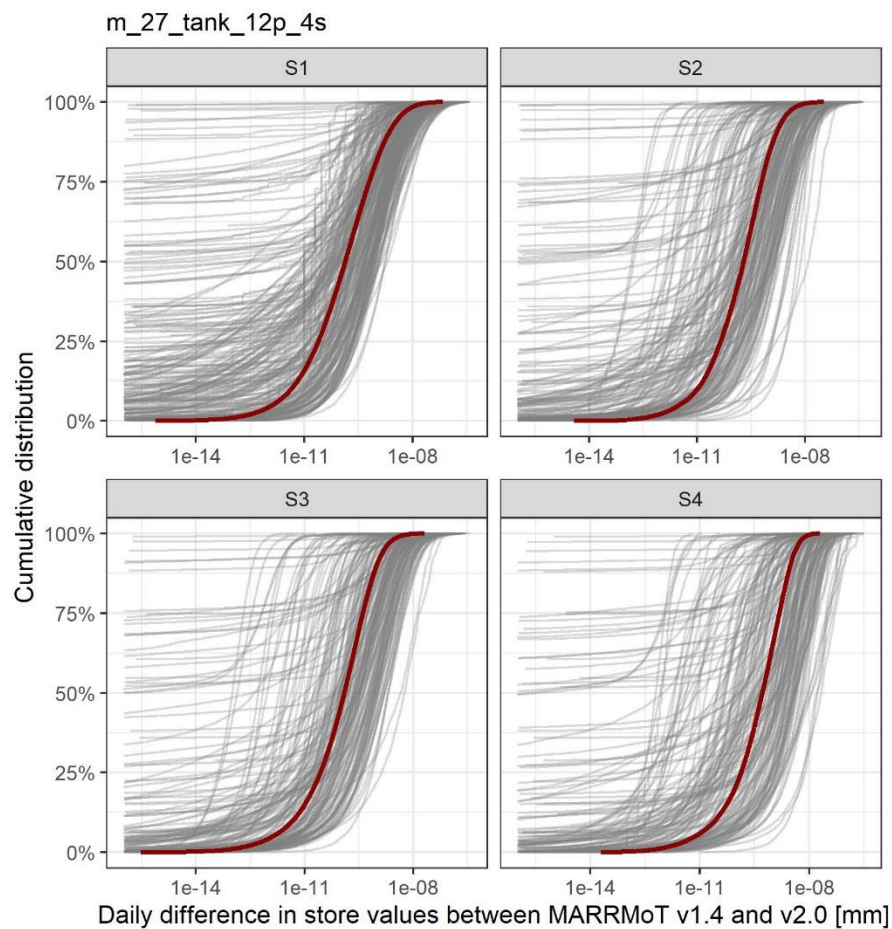

**Figure S5: Differences in daily storage between MARRMoT v1.4 and v2.0 of m\_27\_tank\_12p\_4s. Each grey line is one of 559 catchments, red line indicates their average.**

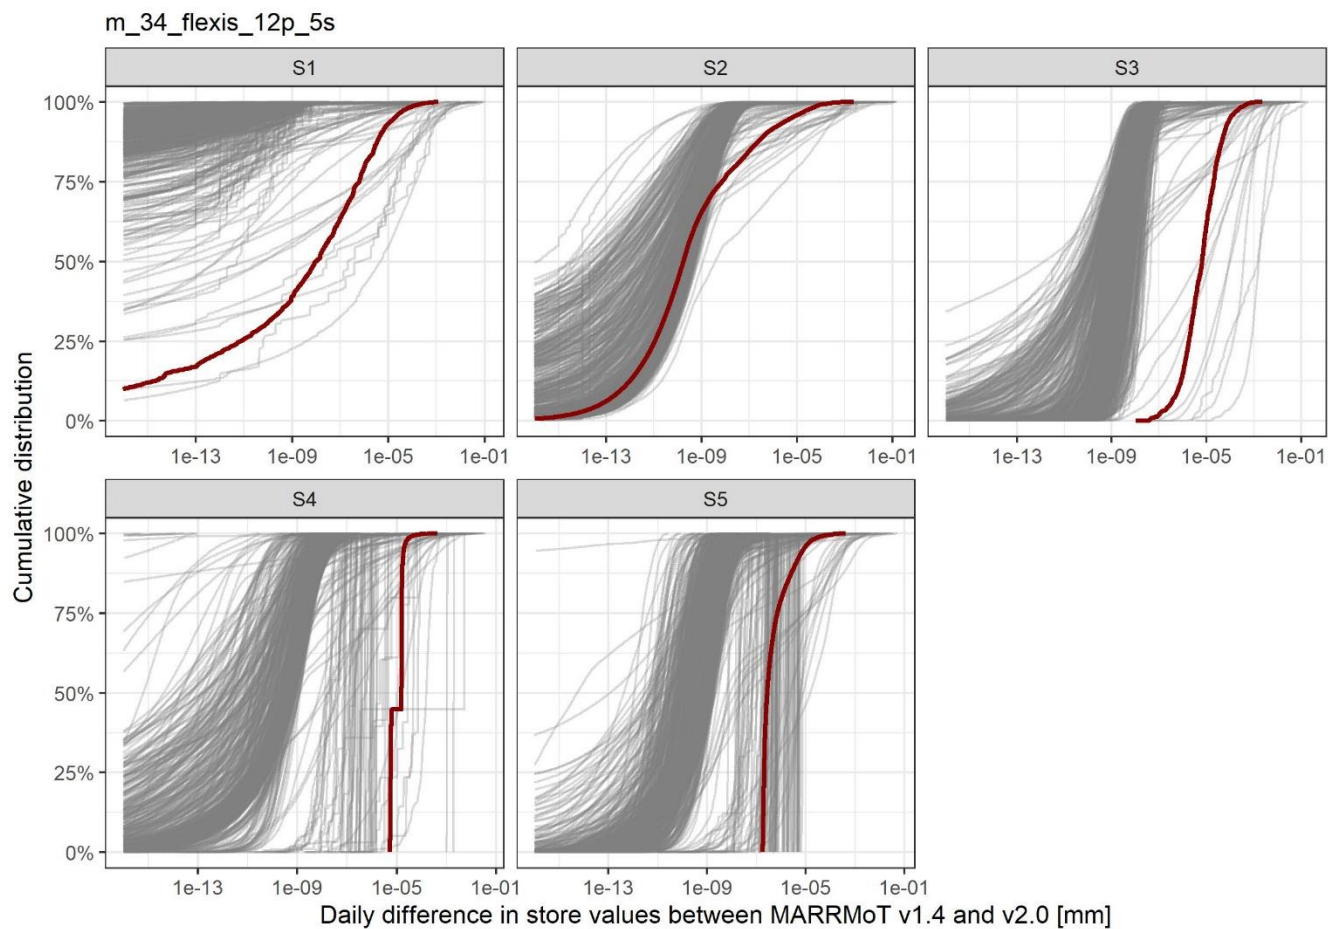

**Figure S6: Differences in daily storage between MARRMoT v1.4 and v2.0 of m\_34\_flexis\_12p\_5s. Each grey line is one of 559 catchments, red line indicates their average.**
